# Supplementary material for: Parallel Chemical Genetic and Genome-Wide RNAi Screens Identify Cytokinesis Inhibitors and Targets
Source: PLoS Biol. 2004 Oct 5;2(12):e379. doi: 10.1371/journal.pbio.0020379 (PMC528723; doi:10.1371/journal.pbio.0020379)
Supplement: Table S3 — Gene names, FlyBase IDs, Gene Ontology annotations, forward and reverse primers, and amplicon lengths are shown. “HFA amplicon” and “DRSC dsRNA ID” are internal dsRNA identifiers. The number of potential secondary targets based on 21 nucleotide fragments is the number of genes that have at least one length of 21 bp or more with matching sequence of 21 bp or more of this amplicon. The criteria used in this analysis are such that it may be prone to false positives for secondary targets. The binucleate percentage per well, the relative increase in binucleates relative to the neighboring wells (1.25 = 25% increase), cell number per well, and relative increase or decrease in cell number relative to the neighboring wells are shown for datasets 1 and 2. Annotations for dataset 3 are only shown when they help to define a particular phenotype. (97KB XLS). [file pbio.0020379.st003.xls]

## Sheet: Sheet1
										Data Set 1				Data Set 2			Data Set 3
Predicted Targeted Gene	FBgn	GO	HFA Amplicon	DRSC dsRNA ID	'S' Primer	'R' Primer	Amplicon Length	Number potential 2ndary targets	% binucl./well	relative increase binucl.	number nuclei/well	relative increase cells/ well	% binucl./well	relative increase binucl.	number nuclei/well	relative increase cells/ well	phenotype data set 3
Act57B	FBgn0000044	GO:0007507, GO:0007010, GO:0005884, GO:0005200	HFA04042	DRSC04042	AGGATTCCATTCCCAGGAAG	CCGTCCTGCTGACTGAG	510	5	20		853.5		15		610.5
Act5C	FBgn0000042	GO:0007291, GO:0007010, GO:0005884, GO:0005200	HFA17723	DRSC17723	CCGCAAGCCTCCATTCC	GAGGCCCCGCTGAACC	500	5	5.08143	5.90821	315	0.838881	45		598.5
Act79B	FBgn0000045	GO:0007010, GO:0005884, GO:0005200	HFA11604	DRSC11604	TGCCGCAGGACTCCAT	ACCGAGGCTCCCTTGAA	505	5	2.12885	3.63205	725	0.990099	2.75415	4.25844	779	1.05986	80% binucleates
Act87E	FBgn0000046	GO:0007010, GO:0005884, GO:0005200	HFA14104	DRSC14104	ACCCGGAGTCGAGGACA	TGTGTGACGATGAGGTTGC	471	6	2.99283	4.32773	696	0.835284	2.23559	2.6839	623.5	0.980731
Act88F	FBgn0000047	GO:0007010, GO:0005884, GO:0005200	HFA14105	DRSC14105	CGACTCCATGCCCAGGA	GACCGAGGCTCCACTGA	499	6	2.89399	4.17173	719	0.993437	3.09065	2.32859	599.5	1.07678	90% binucleates
Arp66B	FBgn0011744	GO:0030589, GO:0007010, GO:0030037, GO:0005884, GO:0005885, GO:0003779, GO:0005200	HFA09669	DRSC09669	GATCCGGAGACGTGTGTC	CGAGGGCTATGTGATCGG	505	0	2.48495	1.90263	586.5	1.07961	2.34369	3.20653	650	0.938628
ATPsyn-beta	FBgn0010217	GO:0006144, GO:0015992, GO:0007010, GO:0006928, GO:0000275, GO:0008553	HFA17194	DRSC17194	ATATGGCCTGAACAGAAGTAAT	CTCCTGGCTCCATACGC	508	0	2.79334	2.12547	196.5	1.21109	2.09424	2.38768	547	0.854354
ATPsyn-gamma	FBgn0020235	GO:0006144, GO:0015992, GO:0000275, GO:0008553	HFA14094	DRSC14094	CAGCGAGAACTCCAGATAG	AAGGCGGCTCGTCCTTA	507	0	1.00611	1.10125	187	1.06401	2.68054	2.18933	502.5	0.961722	w
barr	FBgn0014127	GO:0000070, GO:0007076, GO:0007067, GO:0000796	HFA03488	DRSC03488	TTCTTCGCTCGTTGAGTG	TGCCACATGCTGAAAGGTC	514	0	2.29927	2.61744	695.5	0.892811	1.42466	1.24806	640.5	0.906903
betaCop	FBgn0008635	GO:0006886, GO:0006887, GO:0005794, GO:0030126, GO:0006890	HFA20312	DRSC20312	ACTCTGGGTGGCATAGGTT	GGACACTGGCAAGTACAGG	502	0	2.46321	2.71149	366	0.590799	2.07855	2.21365	341	0.5748
beta'Cop	FBgn0025724	GO:0006886, GO:0006887, GO:0006897, GO:0007166, GO:0030126	HFA03492	DRSC03492	CTCTTTAACCAGAGACATGTTG	TTTCGGAGTGCGTCAAAAC	506	0	out of focus				6.3325	5.12139	103	0.358261	m. lc
Bx42	FBgn0004856	GO:0006366, GO:0005634	HFA17743	DRSC17743	TTTGGCGTTCTTCCAGTTC	TGGACGACAAGGGAAAGG	506	0	2.59246	2.33208	507	0.938454	6.89263	6.00081	171	0.368336
CaMKI	FBgn0016126	GO:0007268, GO:0006936, GO:0019722, GO:0005829, GO:0004684, GO:0004674, GO:0005516, GO:0004702	HFA17162	DRSC17162	TAAGTGCCAAATGATCATTGAA	TTACTGGTGGAGAACTCTTTG	186	0	1.46206	2.20654	683	1.14166	2.4708	2.10491	767	1.32413
cdc2	FBgn0004106	GO:0007067, GO:0000086, GO:0005634, GO:0004674, GO:0004702, GO:0004693	HFA03504	DRSC03504	AGTCGGGTAGCGAAGTAAC	GTCTGTTTGGAGGATGTTTTG	577	0	1.4343	5.56394	388.5	0.499357	3.03473	3.7158	447.5	0.795202	lc
Cdc27	FBgn0012058	GO:0007067	HFA11112	DRSC11112	CCATCGGCCGATTGTTTC	GATGATGGGCAAAAAGCTAAA	519	1	0.891884	1.77354	613.5	0.875491	1.52916	1.38097	612.5	0.967997
CG10107	FBgn0035713	GO:0008234	HFA09698	DRSC09698	GGATTAAAGGTTGCTTTACGG	GGTGCAAAAGTGGACCAAG	500	0	0.867889	2.40737	749.5	1.06463	3.56242	3.08765	430.5	0.694915
CG10260	FBgn0040335	GO:0016310, GO:0007242, GO:0004430	HFA18655	DRSC18655	CCTTATCCTTCTCGCTAAGTA	CGATCAGTACCTCTCCTTTC	512	0	3.4442	2.22568	260.5	0.8336	1.92222	1.49986	704.5	0.922724
CG10522	FBgn0036295	GO:0007399, GO:0007067, GO:0007242, GO:0006886, GO:0007398, GO:0007010, GO:0000910, GO:0006928, GO:0007155, GO:0004674, GO:0004702, GO:0005200, GO:0019992	HFA09740	DRSC09740	GAGGCGATCTCCTCGTTC	AAATGTGGTCCAAGAAGGAAG	505	0	25		583.5		70		524.5
CG11451	FBgn0037025	GO:0007165, GO:0007154	HFA11663	DRSC11663	ATCAGTAATTGAAAATAGGGCAT	CGTAGGGTGCAAACTAACA	519	0	2.20164	3.56656	585.5	0.920236	1.05967	1.68806	753.5	1.02552
CG12476			HFA03820	DRSC03820	AGCAATCACAGGGTGGGG	CAAAAAAGCCGCTGGTGT	190, 134	0	1.77926	1.19554	540	0.972535	1.90796	1.59476	693.5	0.935582	w
CG12972	FBgn0037076		HFA11682	DRSC11682	TTTCCTGGTCGCCATGTG	GCCGCAAGTTCGAAATGA	519	0	1.21471	2.42172	611	1.02905	2.49813	2.91143	779.5	1.07964	lc
CG13028	FBgn0036676		HFA09908	DRSC10309	ACGCGTCCTGCTCACC	GCATTGGGGCTGATCTTCA	505	0	1.5381	1.19747	488	1.35368	2.42745	1.69569	559	0.878585	w
CG1316	FBgn0035526	GO:0003723	HFA08304	DRSC08304	TGCCACCAGGACTTTAAGG	ATCGCAATCGCGCAGT	301	0	1.62128	1.81732	402	0.712766	1.68535	0.990433	456.5	0.863765	w
CG1340	FBgn0039797	GO:0006413, GO:0005829, GO:0003743, GO:0003723	HFA14582	DRSC14582	TTAAAGTTGTAGGTGCGATTG	CGAGACTCTGGCACAACT	513	0	1.42151	1.39902	818	1.12789	2.06628	1.62157	614.5	1.0983
CG1420	FBgn0039626	GO:0008248, GO:0005681, GO:0000398	HFA14729	DRSC14729	GCTTCTCTGCTTTAAGTTGTC	AAGTCCCGTGAGGACTGG	508	1	4.28397	6.2246	157.5	0.417219	1.84064	2.01819	595	0.985099
CG14907	FBgn0038455		HFA15027	DRSC15027	ATTTGCCATAAGACTACTATTGA	TGGAAAATTGCGATCATCGT	514	0	1.08787	1.44999	686	0.987761	3.22739	2.74276	559.5	1.06217
CG15157	FBgn0032675		HFA02458	DRSC02458	CAGTACCGCCCGAACCA	CAAGCTGCACGGCAATG	503	65	3.51394	3.64741	132	0.28115	0.906318	0.824952	485	0.683099
CG15609	FBgn0034180	GO:0003779, GO:0007010, GO:0005200, GO:0005509	HFA06561	DRSC06561	GGCACAAAATGATGAATAATAGC	GATGTGAAGCCAAAGAAGAAG	494	0	0.506215	1.38536	980	0.978288	1.9712	1.4248	684	0.980294
CG15867	FBgn0040961		HFA02510	DRSC02510	ACACTCACCTTGCCGTAG	TGGAAGTGGCCACAACAAA	226	20	3.55111	2.26183	604	1.08098	2.15905	1.4706	593	1.04863
CG16779	FBgn0037698		HFA15153	DRSC15153	CACTTTCCGGCTCCAGTT	CACCATTGGTGCCGGTG	512	0	1.58261	2.90734	720.5	1.03335	2.05976	2.93646	874	1.1665
CG16941	FBgn0038464	GO:0000398, GO:0005681, GO:0005686, GO:0008248	HFA15166	DRSC15166	TATCCGTACGACGCTCAG	AGTCGGACGACGAGGG	507	0	1.46455	1.71521	624	0.863369	2.67426	3.14008	427.5	0.809276
CG17137	FBgn0032308	GO:0006839, GO:0006820, GO:0005739, GO:0008308, GO:0015482, GO:0005741	HFA02584	DRSC02584	GCACTGGAGGGCAATTCC	GTTGGCCTCGCTGTTCT	310	0	1.75212	1.28144	573	0.983691	2.81882	3.9177	631.5	0.884144
CG17905	FBgn0032598		HFA02640	DRSC02640	TGCATTCAGATAGTCGACTTT	ATCGTGGCCCAGAGATGT	515	0	0.986818	1.47635	716	0.94025	2.18519	2.38554	643.5	0.940789
CG1796	FBgn0030365	GO:0007165	HFA19786	DRSC19786	TCCCACAGACGCACCG	CACGCACCCTGGAAACT	503	1	1.8906	2.119	603.5	0.965214	1.63575	2.97156	520	0.766962
CG18234	FBgn0036794	GO:0006464, GO:0019538, GO:0016491	HFA10309	DRSC10696	ATTGCTGTCCCATCAGTAATC	GAAGTACAATCCAAACGAGAG	292	0	1.14044	1.89565	707.5	0.996128	1.32292	1.95227	625.5	0.900648
CG18398	FBgn0032728		HFA02671	DRSC02671	TGGTTGGTGGGCTACCATT	AATCTACTCGTTCCCTACCTT	510	0	0.856239	2.01999	813	0.97307	2.43088	2.74927	546.5	0.8398
CG18591	FBgn0031962	GO:0000245, GO:0000398, GO:0005681, GO:0030532, GO:0008248	HFA02680	DRSC02680	GGGACTGACGTTCTGTATGA	TCAAAGGAAATCCCAAGGTG	266	0	1.03527	1.64796	662	1.2682	0.898903	1.02316	611	0.796351	w
CG2807	FBgn0031266	GO:0000398, GO:0008248, GO:0005681, GO:0005686	HFA00535	DRSC00535	TGGCCAAGGCTGTAATTGT	GTCATTTATTAGTGAAGGTAATTGA	480	0	6.17244	5.94355	225	0.357711	4.00098	2.41552	376	0.499502
CG31004	FBgn0051004		HFA14472	DRSC14472	ACTTCCATGGCAGGAAGAC	TCGAGCGTCGTCCCTC	510	0	0.888114	1.57309	433	0.893244	1.18089	1.14096	806	1.12964
CG31037	FBgn0051037		HFA15305	DRSC15305	CAACACACACGGTCTTATATG	TGGTGACCAATAGCAAATATCA	293	0	0.992914	2.44172	755	0.92383	1.22132	0.755885	539.5	0.941947	w
CG31284	FBgn0051284	GO:0006410, GO:0006471, GO:0006260, GO:0016779, GO:0005057, GO:0005102, GO:0005262	HFA15278	DRSC15278	TGTCACATAAATCACGGATTTG	GAATCTTGGCTATAAGGAGGG	276	2	1.63149	2.5572	414	0.978723	1.60773	1.63833	653	0.943642
CG3203	FBgn0029897	GO:0006412, GO:0005842, GO:0003676, GO:0003735	HFA18293	DRSC18293	AACGCAACATCTTCTCCTTT	ACCGCCCAGGCCATCA	460	0	3.76554	5.25017	292.5	0.381232	5.28464	7.21459	189	0.262136
CG32425	FBgn0052425		HFA11739	DRSC11739	TGGCAGCCTGCTTCTCT	GCAAATCGATCAGCTGTGA	412	49	1.30256	2.24517	616	0.958382	1.58928	1.68244	527.5	0.793233
CG32666	FBgn0052666	GO:0007165, GO:0006936, GO:0006917, GO:0004674, GO:0004702, GO:0005200	HFA19778	DRSC19778	TGGCGACTGGCTTCTTT	TGGCTGCTTGGATCACATT	500	8	5.31355	6.06877	186.5	1.14946	3.18376	3.30198	488	0.882858
CG4454	FBgn0032105		HFA02749	DRSC02749	GACTGCCGTATTTGGATAGT	CTGGCCGCCCACACAG	346	21	15		308.5		25		386
CG5127	FBgn0039335	GO:0016192, GO:0007041, GO:0006886	HFA15722	DRSC15722	TCGATCTCGCTTAGCAATC	CGCCAGCTTGCTCACT	495	0	2.85335	1.70178	355.5	0.980014	3.48183	1.21797	351.5	1.03306	w
CG6015	FBgn0038927	GO:0000398, GO:0005681, GO:0008248	HFA15948	DRSC15948	AGCGTCGACTTCTCCTC	CCACGCTCAAGGAGGTAA	499	0	2.5678	2.19349	596	0.912361	1.55486	1.30236	512.5	0.909898
CG6639	FBgn0032638	GO:0004252	HFA02978	DRSC02978	GTTGTTGGCACCTGATTTGA	GGTGGGTATCCAACAACCAA	444	0	0.458974	0.624461	765	1.08242	2.52188	1.58539	555.5	1.11156	w
CG6694	FBgn0035900		HFA10696	DRSC10704	TTGGGCTGCGCTTCATT	ATCCATATCAATCCGCACTTT	500	0	1.21978	1.94348	780	1.15214	1.98124	2.04162	641	1.05255
CG6749	FBgn0036040	GO:0006952, GO:0019221, GO:0007166, GO:0007186, GO:0007155, GO:0004930, GO:0004872, GO:0007165, GO:0019226	HFA10704	DRSC10726	TACGATTGCCATTCAGGTTG	TGAATGCCTTTCGTGGACT	507	0	3.27847	2.26887	333.5	0.635844	out of focus				w, lc
CG6800	FBgn0038902	GO:0000074, GO:0006468, GO:0004693, GO:0004674, GO:0004702	HFA16119	DRSC16119	ATATCCACTCCGGTTCCATAC	TGGACATCATTGATATATATCCTG	370	0	1.64062	2.24917	600	0.923432	1.60326	1.72732	631.5	0.863295
CG6885	FBgn0036810		HFA10740	DRSC10798	ATCGCCTCGGAGCAAATA	TGGATGCAGTTCCGCAAC	515	0	2.37709	3.42133	427	0.618616	3.32835	5.29131	362	0.51148	m
CG7236	FBgn0031730	GO:0007169, GO:0004674, GO:0007242, GO:0000074, GO:0004702, GO:0004693	HFA03037	DRSC03037	CGCTTGGTCGGATCCTT	GGGCGTGGCCTACTGC	495	0	1.2203	1.37691	571.5	0.868541	1.58582	2.12176	739	1.00305
CG7552	FBgn0038255		HFA16257	DRSC16257	TACCAATCTCTGGGATCCAG	GCCGAATCTGCAACAAACC	264	29	1.28052	1.46249	829.5	1.18204	1.39088	1.90985	652.5	0.998088
CG7730	FBgn0036689		HFA10909	DRSC10909	ATCGTAAACACCATTCGCTA	GCTTGATGATCGCCCCTA	509	0	1.23013	1.4962	772.5	1.23353	2.17391	1.96194	368	1.08395
CG8405	FBgn0034071		HFA05599	DRSC05599	AGGTATGTCAGCGACGTTA	CCCAGCACCAGGTCTTCA	443	2	1.39216	1.56143	208	0.801541	1.73417	1.15177	547.5	1.16738	w
CG8636	FBgn0029629	GO:0003723, GO:0003743, GO:0006413, GO:0005852	HFA18427	DRSC18427	GACAGATTCGATATCCTAATGG	GGTGGAGAACGGACAGAAG	504	0	3.43123	3.41385	584	0.774279	4.66732	2.69636	300	0.520833	lc
Chc	FBgn0000319	GO:0006898, GO:0006886, GO:0008021, GO:0030135, GO:0005905, GO:0030125	HFA20229	DRSC20229	CACAATCCACGCTCGTAG	CCCGAACGGGTGAAGAAC	512	0	1.18909	1.60439	673	0.893462	1.16658	1.22069	771.5	1.03906	w
cpb	FBgn0011570	GO:0003779, GO:0003782, GO:0005200, GO:0008290, GO:0007010	HFA00809	DRSC00809	TCCATCTCCTCGACCATCT	GAGCACGGCAAGGACTAT	503	0	0.744944	2.11336	739	0.871976	1.6456	1.62292	548.5	0.931635
crn	FBgn0000377	GO:0000398, GO:0005681, GO:0016607, GO:0008248	HFA18755	DRSC18755	GCTCAGATGCAATAGCTGTA	TAGCCCTAGGCGAAACAG	495	0	5.48691	4.78634	223.5	0.428366	4.39578	2.91773	216	0.440816
CycA	FBgn0000404	GO:0016359, GO:0007067, GO:0005634, GO:0005737, GO:0016538, GO:0019209	HFA11123	DRSC11123	ATTGTACTTTTCCCGCATGG	TCGCTCATGGAGGGAGAA	225	0	2.25615	5.95859	439	0.560664	2.92955	2.87961	409.5	0.71466
deltaCOP	FBgn0028969	GO:0006890, GO:0006886, GO:0006887, GO:0030126	HFA18760	DRSC18760	CCGCCTTGGATTTGGTGT	TCCCGAGTACAGCCACT	407	0	3.56342	4.05067	212	0.379758	4.53255	3.48476	198.5	0.426652
dia	FBgn0011202	GO:0007283, GO:0007067, GO:0005826, GO:0005200, GO:0003779	HFA03519	DRSC03519	AATGCCTTGTCGGACATTTT	GGTCGGAGGAGTACGAGA	505	1	6.55178	9.68311	597.5	0.767502	20		549		75% binucleates
dm	FBgn0000472	GO:0008361, GO:0000074, GO:0045927, GO:0030307, GO:0040018, GO:0009993, GO:0005634, GO:0003700, GO:0003677	HFA18762	DRSC18762	ATCTGAGGGGGTCTCCAAAT	GATGGGCAGCAATAATATCTC	505	12	13.0435	19.6095	23	0.105869	4.90368	3.51978	291.5	0.515473
dmt	FBgn0016792	GO:0007422, GO:0005634, GO:0005554	HFA16932	DRSC16932	AAGTTCTCCGCATTCTCTTC	TAATTTGGCCCGATCCGTA	516	0	1.30108	2.14655	656	1.03266	1.27946	1.23363	685	0.967514	w
Dox-A2	FBgn0000486	GO:0006508, GO:0008541, GO:0005838, GO:0004175, GO:0008047	HFA03318	DRSC03318	TGCGTGAGCTGGAAGTAG	ACGCACCCTTGATCTGATT	495	0	1.50761	2.04016	710	0.86744	2.07418	2.056	627	0.93722
Dp	FBgn0011763	GO:0000074, GO:0045850, GO:0009993, GO:0008069, GO:0005634, GO:0003704, GO:0003702, GO:0003677	HFA07402	DRSC07402	AATTTGCGGGCAGTCCTAT	ACTCGTTGCACTCCATGTC	309	0	2.24428	6.52698	483	0.539213	4.5093	3.16371	144.5	0.304531
E(Pc)	FBgn0000581	GO:0006325, GO:0005700, GO:0005701	HFA05281	DRSC05281	AGTGGGCAGGACTAGTGC	ACTGCGTTGTCGTCGTAA	500	0	2.21247	2.51671	360.5	1.26491	3.25336	2.82479	550	0.952381
E2f	FBgn0011766	GO:0006357, GO:0042023, GO:0005634, GO:0003702, GO:0003677	HFA16655	DRSC16655	GCGCCTTGATCACGATAAC	CGCTGTCGACGCCCC	492	0	2.82599	3.87809	361	0.60242	2.16205	3.49674	386	0.704058
eIF-3p66	FBgn0040227	GO:0005829, GO:0005852, GO:0006413, GO:0003743	HFA16938	DRSC16938	CGATGACAATATCCCAGGAAT	GTTCCGCAACATGAGGAATT	506	0	2.33515	2.77667	498.5	0.850683	3.63991	2.35798	381	0.67854
eIF3-S10	FBgn0037249	GO:0006413, GO:0006445, GO:0005852, GO:0003743	HFA12339	DRSC12339	TGGAAAGCATCTTCTTACCAT	TCGTATTGACCACCAGAAGA	518	0	3.11079	4.72924	498.5	0.722988	2.82828	3.35723	412	0.534544
eIF3-S8	FBgn0034258	GO:0006413, GO:0006445, GO:0005852, GO:0003743	HFA06905	DRSC06905	GATGTGCGCCAGGATGG	GCCCATGAAGCTAGAACAC	508	0	2.32427	3.87226	582	0.815983	3.48311	3.9305	275.5	0.487179
feo	FBgn0030241	GO:0007067, GO:0000910, GO:0005102	HFA19398	DRSC19398	AGAAAGGGTGTGTTCTCCTG	GGAGACAGACGAGTATGCC	513	2	50		371		35		589.5
fwd	FBgn0004373	GO:0004430, GO:0007242	HFA08580	DRSC08580	GGAGCACATCAGACACAGG	CCAAGAATGCCATATTTCGC	510	0	0.630613	1.6569	951.5	0.960141	2.56082	1.63448	721	1.01193
gammaCop	FBgn0028968	GO:0006890, GO:0006886, GO:0030126	HFA16955	DRSC16955	GTCCATCTGGCAACGACC	TCGGTAGAGCGTCTGATG	492	0	4.3956	6.6756	91	0.374486	4.2166	2.51133	366.5	0.673713
geminin	FBgn0033081	GO:0000074, GO:0008156, GO:0003677	HFA04984	DRSC04984	TGTCGTCCTCCTCCACCT	ACAGAGGCCGAGCAGAA	508	0	5.33529	4.98958	272.5	0.510778	3.89655	4.30909	307.5	0.440387
hbn	FBgn0008636	GO:0007601, GO:0006355, GO:0006357, GO:0007399, GO:0007398, GO:0005634, GO:0003700	HFA04082	DRSC04082	ACTTTACGCGGCCTCTC	CTGATTACGCATCCCCACC	284	82	1.79645	2.12297	521	0.922941	1.29612	0.828866	732.5	1.09944	w
His2B:CG17949	FBgn0061209		HFA21265	DRSC21265	ATTTAGAGCTGGTGTACTTGG	CCTCCGAAAACTAGTGGAAA	367	0	4.24806	3.41287	164	0.593665	4.60914	2.85511	292	0.822535
His3:CG31613	FBgn0051613	GO:0000786, GO:0006334, GO:0003677	HFA21267	DRSC21267	ACGCTCGCCGCGAAT	GGCTCGTACCAAGCAAAC	403	1	out of focus				11.721	6.7031	59.5	0.184068	w, lc
His4r	FBgn0013981	GO:0006333, GO:0000786, GO:0003677	HFA16703	DRSC16703	AACCGCCAAATCCGTAAAG	CGTGGAAAGGGAGGCAAA	365	0	6.0375	11.7953	285.5	0.3709	4.10217	5.29898	365.5	0.663339
hoip	FBgn0015393	GO:0000398, GO:0005681, GO:0030532, GO:0003735, GO:0003723	HFA03546	DRSC03546	AGCAGTCGCTCGATCTC	GAAGTTAATCCCAAGGCATTC	368	0	3.17189	4.81385	485.5	0.579528	3.79368	4.94896	410	0.549414
Hrb27C	FBgn0004838	GO:0006397, GO:0006403, GO:0030529, GO:0005654, GO:0003729, GO:0003723	HFA03347	DRSC03347	CGCGAGTACATGTCAGTG	GGCCGAGCCTCGTGAT	504	0	out of focus				2.7621	2.75112	295.5	0.427951
Hsc70-4	FBgn0001219	GO:0003754, GO:0016887, GO:0003773, GO:0008077, GO:0005739, GO:0005634, GO:0006952, GO:0007269, GO:0006461, GO:0006457, GO:0009408, GO:0016181	HFA16711	DRSC16711	GCATACCTCCGGGACCG	GAGGCCGAGAAGTACCG	325	0	1.42788	1.55451	738	1.03761	1.1848	2.16686	682	0.994894
ial	FBgn0024227	GO:0007242, GO:0005819, GO:0030496, GO:0000775, GO:0004672, GO:0004702, GO:0004674	HFA03548	DRSC03548	CAGCCGACGACGAACTC	GCCATGAAGGTGATGTTCAAA	506	1	30		338		35		289
l(2)03709	FBgn0010551	GO:0000074, GO:0006139, GO:0008283, GO:0007049, GO:0006260, GO:0006259	HFA06512	DRSC06512	GTAATAAGCTGCGAGGCA	CACCGCGCCATCATCTT	323	0	2.1365	1.63395	371.5	0.964935	1.592	1.33227	662.5	0.963286
lace	FBgn0002524	GO:0004758, GO:0008483, GO:0006629	HFA03564	DRSC03564	GTATTTCTTTTTCAGAGCAATAAC	GACACGTTGCTTAAATCTGG	514	0	0.91075	2.34973	721	0.938497	2.16267	1.9374	531.5	0.848703
Lip2	FBgn0024740	GO:0006629, GO:0004806	HFA02578	DRSC02578	AGTGTCCAATTAGTACCACCT	CTGCACCACCGCGAATA	253	0	2.24694	1.97033	684	1.0033	2.27043	1.45848	639.5	1.01872
lola	FBgn0005630	GO:0019226, GO:0007530, GO:0006333, GO:0005634, GO:0003704, GO:0003702	HFA05220	DRSC05220	CGATCTCGGCATACTTCAC	ATTATACCGGCAACCACAAC	514	9	2.75969	2.48241	217.5	0.638767	1.99227	1.3359	553.5	0.936548
maf-S	FBgn0034534	GO:0006350, GO:0006357, GO:0007498, GO:0005634, GO:0030097, GO:0042803, GO:0046982, GO:0003700	HFA07348	DRSC07348	GCTCGCTGGGAATGGGT	CAAAGCGCGAGAGAAAGT	440	0	2.82536	3.50792	521.5	1.07526	5.39792	3.80603	483.5	1.141
Mes2	FBgn0037207		HFA11593	DRSC11593	GACATCGCGCAGGAAATC	GCAACGCCTCCGACAA	278	0	1.51604	3.51261	309	0.711572	1.04513	1.58969	575.5	0.754507
mor	FBgn0002783	GO:0006357, GO:0005679, GO:0035060, GO:0003682, GO:0003712, GO:0016251	HFA15378	DRSC15378	CAGAATGCACTCGTCTTGA	AGTACACGCCTTCTTGGAG	499	0	1.4553	3.16438	962	1.27841	1.87374	1.74254	823.5	1.28221
Mov34	FBgn0002787	GO:0000074, GO:0006508, GO:0008541, GO:0005838, GO:0000502, GO:0004175	HFA04624	DRSC04624	ACATACATTGTGCCCGTGAA	AAAAGGTGAACGCCAGGG	505	0	1.77189	2.12063	693.5	1.09861	1.93178	3.02825	617	0.835477
msi	FBgn0011666	GO:0019226, GO:0007399, GO:0006397, GO:0007398, GO:0045182, GO:0003729, GO:0003723	HFA17003	DRSC17003	CCAGTGGGTTCATGGTGG	GGCTTTGGTTTCATCACATTC	508	0	3.02724	2.91532	618	0.928974	2.3476	1.45777	513	1.09733
mts	FBgn0004177	GO:0007465, GO:0000159, GO:0004722, GO:0000158	HFA03574	DRSC03574	CACGAGGCGAGATTCCC	AAATGCCCGGTGACAGTG	499	0	1.70805	2.37481	784.5	1.0817	3.25948	3.2968	527.5	0.985521
ncd	FBgn0002924	GO:0006605, GO:0007067, GO:0007100, GO:0005819, GO:0005871, GO:0008569, GO:0003777, GO:0005200	HFA17012	DRSC17012	CCGTGCGCGGTATGAC	AGCATGCTGCTCTAAGCA	498	0	4.55273	6.30063	834	1.105	4.45903	4.18816	684.5	1.1817
noi	FBgn0014366	GO:0000398, GO:0005681, GO:0005686, GO:0008248	HFA12383	DRSC12383	CTCTCTGCTCAGACAACAG	GACCACGTCTTCGATATTCC	520	0	2.14191	4.63948	568.5	0.771109	3.42819	3.15092	281.5	0.641595
pAbp	FBgn0003031	GO:0045946, GO:0006398, GO:0005737, GO:0008143, GO:0003723	HFA07659	DRSC07659	CGCTAGCCGCGTTGG	GCTGAGGCGGCCGTT	490	0	0.69784	1.62011	716.5	0.760616	2.1858	2.25553	411	0.684145
Pabp2	FBgn0005648	GO:0006378, GO:0005634, GO:0008143, GO:0003723	HFA07501	DRSC07501	GCCCTCGGAAGAGGGTT	GGCAGCATGCAAATCGAC	385	0	5.97566	10.8562	410	0.604943	4.57144	3.3189	361.5	0.584951
pav	FBgn0011692	GO:0006605, GO:0007067, GO:0005871, GO:0003777, GO:0005200	HFA08730	DRSC08730	ATTCTCATCATAGTCCTCAATTC	ATGCCAATCGACACATGTTC	518	1	50		307		80		212.5
pbl	FBgn0003041	GO:0000910, GO:0005634, GO:0005089, GO:0005085	HFA11381	DRSC11381	CCATGCGCGATTCGGT	TTTTAAAAACAAGTTGGAAGAGTT	518	0	92.5		302		80		416
Pka-C2	FBgn0000274	GO:0007242, GO:0019725, GO:0006916, GO:0005952, GO:0004691, GO:0004674, GO:0004702	HFA16790	DRSC16790	CTTGGAGTACATCAGGATTACA	CACGCCAGATTCTATGCC	384	3	1.91761	1.16334	174	0.954733	3.77377	5.55835	566	0.954871	m
Pp4-19C	FBgn0023177	GO:0007346, GO:0007017, GO:0000072, GO:0005634, GO:0015630, GO:0005737, GO:0005813, GO:0004722	HFA20559	DRSC20559	ACTTGAAGCCCTCCATTACC	CACGGAGATCTTTGACTACC	311	1	3.4527	2.88683	244	1.16329	3.40146	1.84681	370	1.05114
Pros35	FBgn0003151	GO:0006511, GO:0006510, GO:0005839, GO:0000502, GO:0004175	HFA03401	DRSC03401	ATCTTTGCCTTGCTCATCC	TAAAGATTACGCTGTACTTGTC	502	0	1.83545	2.6801	654.5	0.901826	2.57387	3.25316	629	0.905362
Qm	FBgn0024733	GO:0006412, GO:0005842, GO:0005840, GO:0003676, GO:0003735	HFA11947	DRSC11947	CATCACGCTGAGCTTTTTC	TATGTTTCAAAGAAGTGGGGA	151	0	1.55321	2.37466	503	0.772954	3.01646	3.46694	292	0.424573
Rab1	FBgn0016700	GO:0007165, GO:0017157, GO:0006886, GO:0006897, GO:0003931, GO:0003925, GO:0003928	HFA16808	DRSC16808	TGGTGTGGTCGACTACTTTC	CACCATCACGTCTTCATATTAT	191	0	1.79729	2.66329	511	0.881795	2.16104	1.80543	485.5	0.7685
RacGAP50C	FBgn0033881	GO:0008283, GO:0030178, GO:0007266, GO:0019992, GO:0004871, GO:0005096, GO:0005100	HFA07575	DRSC07575	TGACACTGAACGCAATTGTC	CGATGTGCGCACATCAAA	510	0	20		431.5		50		597
Rca1	FBgn0017551	GO:0007455	HFA03407	DRSC03407	GCCTCGCTTATGAAAACCC	TTTCAATCGCCACACAGTAG	515	0	1.84478	3.92354	419	0.595805	2.77704	3.37477	310	0.533333
rdh	FBgn0064227		HFA08434	DRSC08434	CTAGTTGCTAGTTGCTGCT	ATGTCCGCCAGCGGTC	144	106	out of focus				3.08505	2.28795	517	0.895626	w
Rho1	FBgn0014020	GO:0003925, GO:0003924, GO:0003931, GO:0007186	HFA07530	DRSC07530	CAAAAGGCATCTGGTCTTCT	AAGCAGGAGCCGGTGAA	171	0	40		795.5		25		558
RhoL	FBgn0014380	GO:0007010, GO:0007186, GO:0003931, GO:0005509	HFA16824	DRSC16824	CTGGGATAGCTCAGGGGG	CGGCGAACATAACGAAGA	241	1	2.127	2.11181	624	0.818361	1.49582	1.23219	554	1.04726	w
RnrL	FBgn0011703	GO:0006206, GO:0006144, GO:0005971, GO:0004748	HFA03413	DRSC03413	AATGCCCACGGGACGG	TGGATACCCGATCTCTTCAT	513	0	1.6794	2.23106	507.5	0.960265	1.62218	1.09786	677.5	1.05202	w
RnrS	FBgn0011704	GO:0006144, GO:0005971, GO:0004748, GO:0006206	HFA07533	DRSC07533	ACATCAGCACGGCAAAGT	GATTTGTCCAAGGACCTTACT	508	1	2.44274	2.67459	387	0.594698	3.64891	1.69335	246	0.535073
rok	FBgn0026181	GO:0006928, GO:0007049, GO:0007155, GO:0004702, GO:0004674, GO:0019992	HFA20277	DRSC20277	CAGAGCGGCCACCTTC	GCTCGGCCAGGAGAATG	502	1	out of focus				2.11157	1.55804	693.5	0.982991	w
Rpb5	FBgn0033571	GO:0006366, GO:0009299, GO:0005665, GO:0003676, GO:0003899	HFA06100	DRSC06100	GCTTGAGTCCAAAGTACCG	CCACGATCGGGGCTACC	497	0	2.61057	1.69656	445.5	0.855086	4.10267	7.54439	146	0.248616
RpII215	FBgn0003277	GO:0003676, GO:0003899, GO:0005665, GO:0009299, GO:0006366	HFA20280	DRSC20280	TCGTTGGCCTGCTTTGAA	CTATGGAGTCGGTGATGGTT	505	0	4.45165	7.61833	212.5	0.308194	2.8934	4.77538	300	0.426288
RpL10Ab	FBgn0036213	GO:0006412, GO:0005842, GO:0003676, GO:0003735	HFA10798	DRSC10854	CTGGGGCGGTCCCATG	TGAAGCACATTCCTCGTCC	479	0	1.58423	1.33041	340.5	0.899604	1.94327	1.68345	616.5	0.932678
RpL11	FBgn0013325	GO:0006412, GO:0005842, GO:0003676, GO:0003735, GO:0005515	HFA07537	DRSC07537	CGAGGACGACGTAGAAGT	GCTGGAGCAGCTGACTG	287	0	1.92628	4.11434	474.5	0.629937	3.20634	3.87777	348.5	0.522097
RpL12	FBgn0002611	GO:0003676, GO:0005842, GO:0006412, GO:0003735	HFA04344	DRSC04344	ATTCCGCGGGGACTTCA	AAGCACAGTGGAAACATTGG	202	0	2.4232	2.65582	399	0.756757	4.0768	4.29256	384	0.552717	m
RpL14	FBgn0017579	GO:0005842, GO:0003676, GO:0003735, GO:0006412	HFA11269	DRSC11269	TTGGCCGCGGCCTTC	TCCTCGTTGAACGACTTTG	191	0	2.79634	4.17262	409.5	0.555819	2.56001	3.69127	372	0.50785
RpL15	FBgn0028697	GO:0006412, GO:0005840, GO:0005842, GO:0003676, GO:0003735	HFA20963	DRSC20963	AGCAATGGATTGCAAACCAC	TGGGGGCTTATCGGTACAT	305	0	1.66626	1.93005	144	0.565815	3.50565	3.04968	344.5	0.72298
RpL18A	FBgn0010409	GO:0006412, GO:0005840, GO:0005843, GO:0003676, GO:0003735	HFA07538	DRSC07538	CACGCGGCGGGTCTT	AATCCCGCTTCTGGTACTT	299	0	4.30207	5.58845	394.5	0.807988	out of focus				m, lc
RpL19	FBgn0002607	GO:0006412, GO:0005840, GO:0005842, GO:0003676, GO:0003735	HFA04649	DRSC04649	AGCTCCTGCTTCTTGGTG	GGTTGGATCCCAATGAAATCA	550	0	2.23112	5.74608	408.5	0.450138	7.19389	5.93101	131.5	0.309594
RpL21	FBgn0032987	GO:0006412, GO:0005842, GO:0003735, GO:0003676	HFA03704	DRSC03704	TAGGCAATGAATTCGTATGGA	GACCAACTCAAAGGGCTATC	477	0	5.7512	8.18704	229.5	0.413141	2.7398	2.4889	310	0.420339
RpL22	FBgn0015288	GO:0006412, GO:0005842, GO:0003676, GO:0003735	HFA18707	DRSC18707	GCCACATCCATGATGCTATC	CGGCCAAGAACGTGAAG	481	1	2.72495	3.47889	205.5	0.647244	3.01898	4.49782	295.5	0.4527
RpL23	FBgn0010078	GO:0006412, GO:0005842, GO:0003676, GO:0003735	HFA04648	DRSC04648	CCTGAGCTCGGGCTTTC	CCGCGGGAGGCAAGT	194	0	3.38743	2.85159	528.5	1.17969	3.38285	2.8418	438.5	0.622206	lc
RpL26	FBgn0036825	GO:0006412, GO:0005842, GO:0003735, GO:0003676	HFA10726	DRSC10740	GGCGGCGGTCTCCTC	AACAGAACCCGTTCGTGTC	425	0	2.04347	1.7067	340	0.855346	1.20148	0.973078	719	1.06558	w
RpL27	FBgn0039359	GO:0006412, GO:0005842, GO:0003735, GO:0003676	HFA15638	DRSC15638	GAAACGCAGCTTCTGGAA	AGCAGGGCAAGATCGTAAT	389	0	2.01379	1.71314	371.5	0.651183	3.42006	1.4283	320	1.03309
RpL27A	FBgn0010410	GO:0006412, GO:0005842, GO:0003676, GO:0003735	HFA00781	DRSC00781	CCAAGTCGATGACGGGAG	GAATATCAAGCGGAAGAAGAC	308	0	2.96758	4.57647	404.5	0.556014	6.03314	7.17536	156.5	0.209786
RpL3	FBgn0020910	GO:0003676, GO:0003735, GO:0005842, GO:0006412	HFA16834	DRSC16834	CGAGTAGAAAGCACGTGTC	GTGGTCGAGGCCGTCA	262	0	2.46225	3.98647	411.5	0.672111	4.26029	5.64926	377	0.569917
RpL31	FBgn0025286	GO:0003735, GO:0003676, GO:0005842, GO:0006412	HFA06716	DRSC06716	GTCGCTGGACTCGACATT	CCAAGACCAAGGGTGAGAA	435	0	2.58839	3.55675	423	0.72	6.6584	6.54995	163.5	0.287979	lc
RpL32	FBgn0002626	GO:0006412, GO:0005840, GO:0005842, GO:0003676, GO:0003735	HFA16835	DRSC16835	CGTTCTCTTGAGAACGCA	ATCCGCCCAGCATACAG	456	0	3.94805	4.6978	76	0.355972	6.80272	6.35135	147	0.235106
RpL35	FBgn0029785	GO:0006412, GO:0005842, GO:0003676, GO:0003735	HFA18347	DRSC18347	CTTGACGGCGAACTTCCT	TCGCTCGCGTCTACATT	206	0	4.97076	2.50531	84	0.459016	4.21673	4.27153	405.5	0.844792	m, lc
RpL35A	FBgn0037328	GO:0006412, GO:0005842, GO:0003676, GO:0003735	HFA12302	DRSC12302	TGGCCCATGGCATGACC	GGAGCACGGATCCTTCTAC	195	0	2.1356	3.3412	464	0.74359	2.49426	3.20107	501	0.742222
RpL36	FBgn0002579	GO:0006412, GO:0005840, GO:0005842, GO:0003676, GO:0003735	HFA18708	DRSC18708	ACTTGGCGTGGGTCTGG	GCTACGAGCTGGCTATTG	400	0	5.0462	3.97125	176	0.664778	3.06164	2.54277	283	0.558461
RpL36A	FBgn0031980	GO:0006412, GO:0005842, GO:0003676, GO:0003735	HFA03055	DRSC03055	CTTCCTGAAGATGGGCTTG	GAAACAACGCCGCACCT	160	0	1.41644	1.72516	617	0.957331	1.70966	3.10163	606	0.93808
RpL39	FBgn0023170	GO:0006412, GO:0005840, GO:0005842, GO:0003676, GO:0003735	HFA04651	DRSC04651	ACTTGGTACGCCTCCAGT	CACACAAGTCGTTCAGAATAA	343	0	2.02389	2.46953	518	0.949588	2.38382	2.70183	528	0.874172
RpL4	FBgn0003279	GO:0006412, GO:0005842, GO:0003676, GO:0003735	HFA16833	DRSC16833	CCTTGGCCAGCACCTTG	CGCAGCGCTTCCGTG	507	1	4.0247	6.11405	369.5	0.43975	3.59034	3.19628	278	0.415546
RpL7	FBgn0005593	GO:0003729, GO:0003735, GO:0019843, GO:0005842, GO:0005840, GO:0006445, GO:0006412	HFA03417	DRSC03417	GTTGGAGGCGTACTTGAAG	AAGGCCGCCGTGATTG	577	0	7.25758	5.94381	216	0.397973	7.43802	5.32427	121	0.165867
RpL7A	FBgn0014026	GO:0006412, GO:0005842, GO:0003676, GO:0003735	HFA18709	DRSC18709	CAGAGGATCAACATCGTGG	GCCCAAGCGCGATCTG	355	0	3.06368	1.60477	184	1.47791	3.77535	2.78121	304.5	0.526589	lc
RpL8	FBgn0024939	GO:0006412, GO:0005842, GO:0003723, GO:0003735	HFA08695	DRSC08695	TTACCACCACCGTGAGGAT	ACATCATCCACGATCCCG	505	0	4.01582	4.04388	398.5	0.734901	3.42945	2.60134	409.5	0.933333
RpL9	FBgn0015756	GO:0006412, GO:0005840, GO:0005842, GO:0003676, GO:0003735	HFA03418	DRSC03418	TTCACAACGGTCGTCTTCT	CACGTTTGGATTCCAGTACA	315	0	4.09046	6.17529	516.5	0.656916	3.55309	4.92781	406.5	0.578648
Rpn1	FBgn0028695	GO:0000074, GO:0006508, GO:0008540, GO:0005838, GO:0030234, GO:0004175	HFA11274	DRSC11274	AATCGTCTGCAGCAAGATC	GTTTTGTTAACGCCGGTTTC	506	0	1.34552	1.83898	776.5	0.886922	1.97842	1.43376	556	0.955737
Rpn2	FBgn0028692	GO:0000074, GO:0006508, GO:0008540, GO:0005838, GO:0030234, GO:0004175	HFA16839	DRSC16839	CGAGCGGCGCAACAC	GGAGTAATTCATCGGGGTCA	519	0	2.61498	2.35487	385.5	0.617047	4.64309	2.95977	151	0.2868
Rpn6	FBgn0028689	GO:0006508, GO:0008541, GO:0005838, GO:0004175	HFA07541	DRSC07541	CACTGACGAGCTGGTTGA	TCAATTGTGTAAAGACTGCATT	497	0	1.77518	5.55797	413	0.440533	10.9159	15.7658	59.5	0.117939
Rpn7	FBgn0028688	GO:0006508, GO:0008541, GO:0005838, GO:0004175	HFA16841	DRSC16841	GGCCAGGTGTACGTAGAAG	GTACTTGTGCCGCATCG	502	0	1.89132	1.8816	695	0.755024	2.26118	3.25468	352.5	0.518001
RpS12	FBgn0014027	GO:0006412, GO:0005840, GO:0005830, GO:0003735	HFA11270	DRSC11270	CTGCCTGAGATGGTCCTTA	TGTTCTGTGCATCCTAGCC	250	0	1.9211	1.58258	495	1.00355	2.90364	3.59401	362	0.524638	lc
RpS13	FBgn0010265	GO:0006412, GO:0005843, GO:0003676, GO:0003735	HFA03419	DRSC03419	GCAGTGCTCGACTCGTAT	CGTGACTCGCACGGAG	275	0	4.42907	5.22294	264.5	0.378669	3.55204	4.11884	322.5	0.611954
RpS14a	FBgn0004403	GO:0005840, GO:0006412, GO:0005843, GO:0003676, GO:0003735	HFA18710	DRSC18710	TGGAGTCCGATGGGATGG	GGCACCCAGGAAGGCT	475	1	out of focus				4.1507	2.96132	304	0.482731	w, lc
RpS14b	FBgn0004404	GO:0006412, GO:0005840, GO:0005843, GO:0003676, GO:0003735	HFA18711	DRSC18711	AGAGTCCGATGGGATAGGG	TGGCTCCAAGAAAGGCTAA	475	1	out of focus				5.53906	5.88894	228	0.358773	m, lc
RpS15Ab	RpS15Aa: FBgn0010198, RpS15Ab: FBgn0033555	RpS15Aa: GO:0006412, RpS15Aa: GO:0005840, RpS15Aa: GO:0005843, RpS15Aa: GO:0003735, RpS15Aa: GO:0003676, RpS15Ab: GO:0006412, RpS15Ab: GO:0005843, RpS15Ab: GO:0003676, RpS15Ab: GO:0003735	HFA06129	DRSC06129	GAAGAAGAAGCCGAGAATTTT	TGGTGCGTATGAACGTATTG	389	0	6.21689	7.74548	321	0.549422	3.8324	6.09797	321	0.463873
RpS16	FBgn0034743	GO:0005843, GO:0003676, GO:0003735, GO:0006412	HFA04442	DRSC04442	AACGGTACGACTTCTGGTA	GAGGCCTCCAAGAAGGAG	136	0	2.66875	5.02348	654.5	0.986807	2.73632	1.73192	649	1.10751
RpS18	FBgn0010411	GO:0006412, GO:0005843, GO:0003676, GO:0003735	HFA07540	DRSC07540	ACTTCTTCTTGGACACACCC	CGACAAGGTGGTGACCATC	266	0	3.68205	5.29953	455	0.844548	2.62611	1.75909	534	0.996269
RpS19a	FBgn0010412	GO:0006412, GO:0005843, GO:0003676, GO:0003735	HFA20281	DRSC20281	TAACAATGGGCCCGGTCT	GAAGGTGCCCGACCAGA	377	0	5.02329	3.88191	213.5	0.68871	4.05773	3.21601	372.5	0.607667
RpS24	FBgn0034751	GO:0005843, GO:0006412, GO:0003676, GO:0003735	HFA04414	DRSC04414	TGCCAGTGCCGATCTTG	GTCCGGTACAACCGCTAC	386	0	1.98194	3.94475	547	0.934244	0.957659	1.09325	589.5	0.753836	w
RpS26	FBgn0004413	GO:0006412, GO:0005840, GO:0005843, GO:0003676, GO:0003735	HFA03420	DRSC03420	TACTTCCTGTTCTGGTTGTTG	ACCAAGAAGCGCCGTAA	341	0	5.3367	7.32245	313.5	0.44264	2.8982	2.04298	364	0.58008	m
RpS27	FBgn0039300	GO:0006412, GO:0005840, GO:0003676, GO:0003735	HFA14244	DRSC14244	CGGCTGGCACAAAATGGT	CAAAAGATCTTCTGCACCCT	188	0	1.53883	3.44524	712	0.983086	1.65934	0.773009	489	1.40014	w, lc
RpS29	FBgn0037752	GO:0006412, GO:0005843, GO:0003676, GO:0003735	HFA16433	DRSC16433	CAATGTCGTTGGCGTACTC	TCGCTACTCTCTGGTACTC	566	0	1.83737	2.18747	573	0.839253	4.29779	5.47862	302	0.395029	lc
RpS3	FBgn0002622	GO:0006412, GO:0006281, GO:0005843, GO:0003676, GO:0008534, GO:0003906, GO:0003735	HFA16838	DRSC16838	GGGCAGCGGCTTCTTG	CGTGGAGGTCCGTGTGA	508	0	3.31695	3.47581	420	0.519159	4.11132	3.83699	220.5	0.392349
RpS30	FBgn0038834	GO:0006412, GO:0005843, GO:0003676, GO:0003735	HFA15119	DRSC15119	ATGTGGAGTTGGCGTTGG	GGCCCAGATCCATGGATTC	311	0	3.46218	5.7161	342.5	0.529162	out of focus				m, lc
RpS3A	FBgn0017545	GO:0006412, GO:0005843, GO:0003735, GO:0003676	HFA17168	DRSC17168	CTGTACTGGGGGCTCATAAC	ATGGTTAAAAAGTGGCAAACAC	450	0	out of focus				4.5498	2.80944	285.5	0.595722	w, lc
RpS4	FBgn0011284	GO:0006412, GO:0005843, GO:0003735, GO:0003676	HFA11272	DRSC11272	GGGATAGGTGGGGTCGGT	CTCGTGGCCCCAAGAAG	245	0	3.60628	9.79479	437.5	0.588631	2.61918	4.15161	322	0.474576
RpS6	FBgn0004922	GO:0005843, GO:0006412, GO:0006445, GO:0003676, GO:0003735	HFA18712	DRSC18712	AGACAGAGCTCTTGGACTC	GCTCCTGAAGAAGGGACAC	506	2	5.76651	6.02928	292.5	0.372849	13.3791	8.38381	92.5	0.180752
RpS7	FBgn0039757	GO:0006412, GO:0005843, GO:0003676, GO:0003735	HFA15394	DRSC15394	ATGGTGGTCTGCTGGTTCT	TCATCATCTACGTGCCCATT	319	0	out of focus				4.64563	5.12374	303	0.516184	m, lc
RpS8	FBgn0039713	GO:0006412, GO:0005843, GO:0003676, GO:0003735	HFA16318	DRSC16318	GGCCGGAGGTGAACTGAT	CGCACCCGTGGTGGAA	376	0	2.60132	1.12647	131	0.709066	5.73467	7.74017	151.5	0.25678	m, lc
RpS9	FBgn0010408	GO:0006412, GO:0005843, GO:0003676, GO:0003735	HFA11273	DRSC11273	AGACGCTTCTCGTCCTTC	GTGAACGGCCGCATACC	212	0	1.38684	3.04598	468.5	0.67629	1.66888	2.67532	389	0.568091
sbr	FBgn0003321	GO:0003723, GO:0005654, GO:0006406, GO:0016973	HFA20368	DRSC20368	TTGTTATCCCCCAAATAGAGAA	AACGCCCAGATATACGAAAA	515	0	2.1555	1.04526	259	1.09398	2.9126	2.02907	460.5	0.857143	w
scra	FBgn0004243	GO:0007010, GO:0006928, GO:0005634, GO:0005737, GO:0005200, GO:0008017, GO:0003779	HFA07679	DRSC07679	AATACTGGGAGCAGATCCTAT	CCACTGCCACCCAAGAAG	489	0	90		590		85		470.5
shi	FBgn0003392	GO:0008549, GO:0003925, GO:0003924, GO:0005200, GO:0003777, GO:0008017, GO:0003779, GO:0005875, GO:0005886, GO:0006952, GO:0006886	HFA20373	DRSC20373	GAGCATAGCTTTTGTTTTGATG	ATTCCAATTTATTCGCAAAGAG	511	0	4.68205	10.9459	823	1.00305	3.71625	4.08688	796.5	1.03408
Slh	FBgn0015816	GO:0006886, GO:0006887, GO:0016020, GO:0005737, GO:0000149, GO:0006605	HFA00789	DRSC00789	GCCTGCAGCGCCTCC	AAAACCCAAGGCCTGTGAC	507	0	0.610033	0.888432	747	1.17916	2.39631	1.78189	584.5	0.805096	w
Smr	FBgn0024308	GO:0045892, GO:0006357, GO:0005700, GO:0003714, GO:0005515	HFA19495	DRSC19495	TCAGTAGTAGCCCGGATTG	ACTCAGCGACGAAGATTAG	439	129	2.6289	3.06365	199	0.32058	3.17054	4.1108	95	0.208105
smt3	FBgn0026170	GO:0006606, GO:0006464, GO:0007067, GO:0007059, GO:0006916, GO:0005515	HFA03611	DRSC03611	ATGGAGCGCCACCAGTC	GTCTGACGAAAAGAAGGGAG	269	0	1.28785	3.53978	489.5	0.605255	1.81283	2.01215	378.5	0.59326
Snap	FBgn0011712	GO:0006886, GO:0019898, GO:0005483	HFA11285	DRSC11285	TGATGAGCTTGAACTCCCT	CCAAGTCTATTCAGCACTATG	318	0	1.88766	1.54323	502	0.732579	1.72049	1.37691	521.5	0.766912
snRNP69D	FBgn0016940	GO:0000398, GO:0005681, GO:0030532, GO:0008248	HFA09800	DRSC09800	CCCCTGCCGCGATTTC	AGATCCACGGCACCATTAC	238	0	1.27479	1.40574	397	0.710197	1.88446	1.22954	202.5	0.566434	w
Spx	FBgn0015818	GO:0006398, GO:0000398, GO:0005681, GO:0005686, GO:0003723, GO:0008248	HFA18720	DRSC18720	TAGCATGCCCATATTGTTATTC	GTCGGCGCATCAGAAGA	508	1	1.12416	0.531762	89	0.767241	2.32864	2.40667	470	0.646492	w
sqh	FBgn0003514	GO:0006936, GO:0019722, GO:0005860, GO:0042623, GO:0005516, GO:0005509	HFA18837	DRSC18837	GTCGAACAGACCGTTTTTGA	CGCCACCTCCAATGTGTT	485	1	1.24098	1.47513	765.5	1.01897	2.67879	3.19829	694	0.962552
stan	FBgn0024836	GO:0007398, GO:0007186, GO:0005886, GO:0005887, GO:0016021, GO:0050839, GO:0004872, GO:0004888, GO:0004930, GO:0005057	HFA05234	DRSC05234	CAGCATAAGCCGATTTCAG	CCTTTGTTGCAGCTTCAATT	142	58	3.95281	2.18889	183	0.841379	0.850339	0.59227	586	1.00817	w
stg	FBgn0003525	GO:0008138, GO:0004726, GO:0004725, GO:0005694, GO:0005634, GO:0006470	HFA17071	DRSC17071	AGCGGCAGTCGATGATG	GGCCAGATCAAGGAGCAG	517	0	2.4041	1.48678	405.5	0.935949	1.95993	1.17508	304	0.776005	w
Su(var)3-9	FBgn0003600	GO:0006333, GO:0005850, GO:0005829, GO:0008168, GO:0046974, GO:0003743, GO:0042054, GO:0005525, GO:0000049, GO:0003682	HFA13081	DRSC13081	CAACGGCGCCTAGCAC	AGAGCCAGGCGAAAGAG	495	0	2.08121	2.1985	357.5	0.759426	2.63793	7.74862	410	0.618168	lc
sws	FBgn0003656	GO:0016788, GO:0019226, GO:0007420	HFA18843	DRSC18843	ACAGAGCGAGTGGTAGAG	GGTGAGGCAGTGTGACTAT	496	0	1.43687	1.81387	488.5	0.979449	1.7798	1.33921	732	1.05059
Syx5	FBgn0011708	GO:0016083, GO:0007269, GO:0006886, GO:0005886, GO:0005794, GO:0005486	HFA03432	DRSC03432	CTCAACGATGGTAGATTCTATAT	AAAAAGAAGAGCTTATTTGATGA	507	0	2.1376	3.66898	659	0.860594	3.40682	4.52276	505.5	0.801745	m
Tra1	FBgn0033013	GO:0006357, GO:0045449, GO:0000074, GO:0006468, GO:0006281, GO:0000123, GO:0000124, GO:0004672, GO:0003712, GO:0030528, GO:0004702	HFA04884	DRSC04884	AAGGCAAAGTTCCACGAAAA	ACTCCCAAAACTTTCAAGAAATA	506	0	1.3636	2.50087	586.5	0.935034	2.76454	3.55907	741.5	0.960803
Trap170	FBgn0035145	GO:0006367, GO:0006366, GO:0000119, GO:0016455	HFA08235	DRSC08235	GCAGCTGCTCAGCAAAG	CCATGTGCGATGAAAAGATAC	516	1	0.653419	1.48924	603.5	0.62458	0.840919	1.12947	457	0.666667	w
tsr	FBgn0011726	GO:0006461, GO:0007067, GO:0005200, GO:0003787, GO:0003779	HFA04718	DRSC04718	CATTTCTGGATATCTTCTAGAAAC	TGGTGTAACTGTGTCTGATGT	168	0	4.03471	4.15413	311	0.425009	5.18088	3.87324	531	0.817237
twit	FBgn0023509		HFA18575	DRSC18575	GTGGAGTAGCCGCGATTT	AGGTCACTGCCAGATTAAGA	496	0	3.58182	2.36966	186	0.709924	2.95725	1.63276	508	0.829388
Ubi-p63E	FBgn0003943		HFA08703	DRSC08703	GGGGGATTCCCTCCTTATCT	AGCAGCTTGAGGATGGAC	426	4	out of focus				7.68279	3.12791	70.5	0.224701	lc
Wnt4	FBgn0010453	GO:0005576, GO:0004871, GO:0005102, GO:0007223	HFA00976	DRSC00976	AGCCGATTCCTAGGCCC	GAATGGCGATCTCGACAG	509	6	2.91834	4.04101	86.5	0.622302	4.68594	1.25641	278.5	1.25028
yip6	FBgn0040061	GO:0006412, GO:0005842, GO:0003676, GO:0003735	HFA03801	DRSC03801	CGAATGCCCAACTTGATGTA	GGATTGACCAACTACGCTG	425	1	3.00136	3.262	398.5	0.636327	6.24199	8.44502	247.5	0.347368
zetaCOP	FBgn0040512	GO:0016192, GO:0006886, GO:0030126	HFA11412	DRSC11412	CCGTCGCAGATCTCGTC	GCATCCTGGCCAAGTACTA	322	0	5.49968	6.6581	79.5	0.170784	2.15626	2.23586	440.5	0.736007	lc
zip	FBgn0005634	GO:0016203, GO:0007067, GO:0030018, GO:0042623, GO:0005200, GO:0008092, GO:0003774	HFA04725	DRSC04725	TTCAGCTTGGCCAGGTGT	CGCGAGAAGCTTGACAC	494	0	4.48104	4.64673	480.5	0.981614	25		575		70% binucleates
			HFA01059	DRSC01059	CACCTGTTGCGTATACATAGA	AGAAACGGCGCCCTGG	247	4	1.8513	1.34284	297	1.25053	1.08443	0.827536	514.5	1.02695	w
			HFA01398	DRSC01398	CCTTTTTGCCAAGCTCACT	GCCACCACCACCCAACAC	218	0	2.1954	2.55804	376.5	1.01826	2.08656	1.69241	647	0.966032
			HFA03975	DRSC03975	AGCTGGCCGTGCGTC	CAGCAAAGCAGAGTTCAAAA	192	0	1.71046	3.22594	349	1.15563	3.03001	1.64969	494.5	1.13548
			HFA03998	DRSC03998	TAGATGGCGGCTCGGG	GTTGCATTTGCATTTGCATTT	176	13	1.89238	2.19001	376.5	0.966624	2.38951	1.58709	501.5	1.09558
			HFA05059	DRSC05059	ACCTGAGCCGCTGATGTA	CAAGCGCGGCATAATCA	263	0	2.05491	1.64157	390	1.15385	5.17979	1.4985	326.5	0.961708
			HFA05209	DRSC05209	GCGAATTGCGAACTGCC	TGCGACTGCGATTGCTT	177	2	1.99565	2.03629	417.5	0.873431	3.15314	2.13124	463.5	0.870423
			HFA05316	DRSC05316	GAGAAGTGCGTAGTTCTTCC	GCGAACAGGAATTCTCATATAA	457	0	2.97237	2.67372	260.5	0.765051	2.75605	1.84804	544.5	0.92132
			HFA05734	DRSC05734	CGACACTTCAGCTGAGGA	TTTTACGGCCAGGAGATCC	242	1	2.34444	1.58038	277	1.12716	1.07042	1.42654	657	1.03302
			HFA07773	DRSC07773	ACGCTGTGCCTTCTTTTTT	GGCCCATGACGTCGTAAC	190	1	3.39343	3.82225	240.5	0.775181	2.22664	2.29048	696	1.04938
			HFA07932	DRSC07932	ATACGCCGCGTTGAGC	CCACGCCCCCTCCTCC	299	16	2.85708	2.67879	369.5	1.13605	2.86939	1.75559	465.5	0.839117
			HFA07960	DRSC07960	TCCAACTGGGCGTGGTC	CTCCCCGCAATTCGACA	344	0	1.58401	2.15615	388.5	1.01635	1.03215	1.54236	729	1.0228
			HFA08022	DRSC08022	TGAGCTCCTCCAAATCATCT	ACATGAACTGCGGACTGG	411	0	0.974036	1.03156	308	0.998379	2.17946	1.97592	677	1.01082	w
			HFA09009	DRSC09009	ATCTGTGGCAGGACCTTTT	CTGGCTCATCCGGTTGTC	327	7	1.68095	1.4408	466.5	1.15328	1.0856	1.24127	655.5	0.965035
			HFA09064	DRSC09064	GAATGGCCGAATGGCAAAC	GCTCATCTAACATTTTCCTCAC	283	0	1.77338	1.44901	502	1.10027	1.41253	1.4218	707.5	0.995778
			HFA09069	DRSC09069	GCCCATTGGCCATGGTAG	GCATCGGGGGAGGGAAG	281	93	0.766378	0.497558	383.5	0.837794	1.07953	1.34205	664.5	0.892845	w
			HFA09076	DRSC09076	GCTGCGCCGGCAGAA	GAGGTCCGATCTCGAGTC	321	1	1.22573	1.66895	448.5	0.947202	1.72077	2.26723	585	0.775862
			HFA09272	DRSC09272	TGCTGCCCCCCAGAAAC	CCACGTCCCCTGCAGATA	212	0	2.05361	2.21365	525.5	1.1069	1.83574	1.80368	764	1.16954
			HFA09354	DRSC09354	GTCGCGCTTCAGATCATC	TTGATGTTTGCGTCAATTGTC	278	63	1.36114	1.44462	408.5	0.862724	1.52241	2.33511	784	0.952034
			HFA12424	DRSC12424	TCATAGGTAGGCACCTCATG	TGCAGGCACGGAGAGG	190	0	2.1523	2.90969	501.5	0.978059	2.05505	2.13895	657	0.827456
			HFA13174	DRSC13174	AGCACCTTGGCGGTCC	TTTGCCCATTGCAACTTCG	237	32	4.01969	3.38264	153	0.347333	1.81713	1.8733	547.5	0.880579	lc
			HFA13791	DRSC13791	TCGAGCACTCCAGTTATCA	TCATCATCGTCATCAAAGTCC	161	40	2.12402	1.86174	149	0.622129	1.65145	1.88586	572.5	0.92976	lc
			HFA17650	DRSC17650	TCACGAGCAGCAACAGG	GCGACGACGAGCCAAC	304	3	1.14349	1.60194	570	1.00751	1.90705	1.82055	686	0.866983
			HFA19060	DRSC19060	TGCAGTATGCCTTGGTGTG	CAAAGGGCTACAGGTAGTAC	314, 315	0	3.04792	2.57426	162	0.778846	1.24653	1.24075	689	1.00145	w
			HFA19272	DRSC19272	ATAGGCTCCCTTCGTACTC	CAGAACCAAAAGCAGAAGAAT	251	35	1.87713	2.12459	378	0.894675	2.74329	1.9353	543.5	1.09356
			HFA19287	DRSC19287	AGACCCACACATACAATAGTTC	AAACGTGGCCCTGACACT	269	0	1.93326	2.2062	343	0.891488	1.87381	2.46149	774	1.05991
